# Supplementary material
Source: publisher site journal article supplement (https://www.dovepress.com/article/561820)
Supplement: Supplementary file 1 [file 561820_Supplementary%20Material%20%285%29.pdf]

## Supplementary Material

**Table S1. The inclusion and exclusion criteria in SAAS**

|                    |                                                                                                                                                                                                                                                                                                                                                                                                                                                                                                                                                                                                                                                                                                                                                                                                                                                                                                                                                    |
|--------------------|----------------------------------------------------------------------------------------------------------------------------------------------------------------------------------------------------------------------------------------------------------------------------------------------------------------------------------------------------------------------------------------------------------------------------------------------------------------------------------------------------------------------------------------------------------------------------------------------------------------------------------------------------------------------------------------------------------------------------------------------------------------------------------------------------------------------------------------------------------------------------------------------------------------------------------------------------|
| Inclusion criteria | <ul style="list-style-type: none"><li>- A diagnosis of new-onset asthma made by a respiratory specialist</li><li>- Diagnosis confirmed by at least one of the following objective lung function measurements:<ul style="list-style-type: none"><li>- FEV<sub>1</sub> reversibility in spirometry of at least 15% and 200 mL after 400 µg of salbutamol</li><li>- Diurnal variability (<math>\geq 20\%</math> on at least three days) or repeated reversibility (<math>\geq 15\%/60</math> l/min on at least three occasions) during a two-week PEF monitoring</li><li>- A significant decrease in FEV<sub>1</sub> (15%) or PEF (20%) in to exercise or allergen challenge test</li><li>- A significant reversibility in FEV<sub>1</sub> (at least 15% and 200 mL) or mean PEF (at least 20%) in response to a trial with oral or inhaled glucocorticoids</li></ul></li><li>- Symptoms of asthma</li><li>- Age <math>\geq 15</math> years</li></ul> |
| Exclusion criteria | <ul style="list-style-type: none"><li>- Physical or mental inability to provide signed informed consent</li><li>- Diagnosis of asthma below the age of 15 years</li><li>- Of note:<ul style="list-style-type: none"><li>- Patients with comorbidities, either other lung disease or any other significant disease, were not excluded</li><li>- Patients were not excluded because of smoking, alcohol use or any other lifestyle factor</li><li>- Respiratory symptoms or any other disease during childhood was not a reason to exclude patients but a diagnosis of asthma at age <math>&lt; 15</math> years was an exclusion criteria</li></ul></li></ul>                                                                                                                                                                                                                                                                                        |

FEV<sub>1</sub>= forced expiratory volume in one second. PEF= peak expiratory flow. SAAS= Seinäjoki Adult Asthma Study. Published earlier by Kankaanranta et al, 2015.<sup>1</sup>

**Table S2.** Baseline (1999-2002) characteristics in never-smokers, ex-smokers and current smokers.

|                                            | Never-smokers       | Ex-smokers          | Current smokers     | p-value |
|--------------------------------------------|---------------------|---------------------|---------------------|---------|
| N                                          | 84                  | 57                  | 33                  |         |
| Age, years                                 | 44.5 ±13.9          | 49.9 ±12.3          | 41.1 ±13.5          | 0.014   |
| Males                                      | 23 (27.4)           | 35 (61.4)           | 15 (45.5)           | <0.001  |
| BMI kg·m <sup>-2</sup>                     | 27.1 (23.8-30.3)    | 27.4 (24.1-30.1)    | 26.6 (24.3-30.5)    | 0.805   |
| Pack-years <sup>#</sup>                    | 0                   | 10 (4-20)           | 15 (6-23)           |         |
| DL % predicted                             | 97.6 (89.3-114.0)   | 95.0 (88.0-109.0)   | 91.0 (83.0-103.0)   | 0.136   |
| DL/VA % predicted                          | 104.0 (91.0-115.8)  | 102.0 (85.0-114.0)  | 94.0 (87.0-105.0)   | 0.103   |
| Blood eosinophils 10 <sup>9</sup> /l       | 0.30 (0.18-0.45)    | 0.24 (0.15-0.43)    | 0.22 (0.13-0.40)    | 0.717   |
| Blood eosinophils ≥0.3 x10 <sup>9</sup> /l | 41 (51.2)           | 23 (43.4)           | 15 (46.9)           | 0.669   |
| Pre-bronchodilator lung function           |                     |                     |                     |         |
| FEV <sub>1</sub> L                         | 2.84 (2.21-3.29)    | 2.97 (2.35-3.42)    | 2.79 (2.39-3.62)    | 0.413   |
| FEV <sub>1</sub> % predicted               | 83.5 (72.3-95.8)    | 80.0 (71.0-90.2)    | 80.0 (68.5-89.5)    | 0.448   |
| FEV <sub>1</sub> /FVC                      | 0.750 (0.710-0.810) | 0.760 (0.660-0.805) | 0.740 (0.680-0.795) | 0.375   |
| FVC L                                      | 3.62 (2.98-4.27)    | 3.89 (3.53-4.44)    | 3.60 (3.12-4.81)    | 0.086   |
| FVC % predicted                            | 91.0 (80.0-101.8)   | 90.4 (75.9-99.0)    | 87.0 (79.5-96.0)    | 0.655   |
| Post-bronchodilator lung function          |                     |                     |                     |         |
| FEV <sub>1</sub> L                         | 2.97 (2.46-3.36)    | 3.07 (2.61-3.53)    | 3.17 (2.55-3.78)    | 0.540   |
| FEV <sub>1</sub> % predicted               | 90.0 (79.0-101.0)   | 85.0 (76.0-97.0)    | 84.0 (73.5-96.5)    | 0.284   |

|                                 |                            |                            |                            |       |
|---------------------------------|----------------------------|----------------------------|----------------------------|-------|
| FEV <sub>1</sub> /FVC           | 0.790<br>(0.754-<br>0.840) | 0.786<br>(0.720-<br>0.820) | 0.776<br>(0.730-<br>0.830) | 0.165 |
| FVC L                           | 3.63 (3.21-<br>4.31)       | 3.95 (3.51-<br>4.68)       | 3.98 (3.40-<br>4.94)       | 0.033 |
| FVC %<br>predicted              | 93.0 (82.0-<br>104.0)      | 94.4 (81.0-<br>100.4)      | 88.0 (84.3-<br>99.0)       | 0.929 |
| FEV <sub>1</sub> /FVC ratio<0.7 | 8 (9.8)                    | 12 (23.5)                  | 7 (21.9)                   | 0.073 |
| Atopy <sup>¶</sup>              | 31 (40.8)                  | 17 (31.5)                  | 11 (37.9)                  | 0.554 |
| ICS bud eq/day <sup>a</sup>     | 586 (328-<br>852)          | 688 (497-<br>1024)         | 664 (333-<br>1199)         | 0.549 |

# of ever-smokers (ex- and current smokers) ;

<sup>¶</sup> as defined by positive skin-prick tests. ICS: inhaled corticosteroids

<sup>a</sup> daily dispensed ICS doses as 1000µg budesonide equivalent.

Data are presented as n (%), mean ± SD or median (interquartile range).

Total n=174

BMI: body mass index; DL: diffusing capacity of the lung; VA: alveolar volume FEV<sub>1</sub>: forced expiratory volume in 1 s; FVC: forced vital capacity.

**Table S3.** The change in lung function from baseline to the maximum lung function point ( $\Delta\text{Max}_{0-2.5}$ ) normalized with time from baseline to the  $\text{Max}_{0-2.5}$  point in the groups of never-smokers, ex-smokers and current smokers.

|                                   | Never-smokers           | Ex-smokers              | Current-smokers         | p-value |
|-----------------------------------|-------------------------|-------------------------|-------------------------|---------|
|                                   | n=79                    | n=53                    | n=32                    |         |
| $\Delta\text{FEV}_1$ mL/year      | 368.7<br>(89.3-795.5)   | 238.1<br>(39.2-1051.6)  | 473.1<br>(154.2-1368.3) | 0.454   |
| $\Delta\text{FEV}_1$ % pred /year | 12.1 (3.8-25.6)         | 8.4 (1.3-32.2)          | 14.6 (7.6-41.0)         | 0.487   |
| $\Delta\text{FVC}$ mL/year        | 343.4<br>(0.0-976.2)    | 275.4<br>(-55.6-1118.0) | 534.9<br>(261.2-1456.3) | 0.137   |
| $\Delta\text{FVC}$ % pred / year  | 10.0 (1.3-21.5)         | 5.5 (-0.5-21.4)         | 17.8 (5.9-32.9)         | 0.056   |
| $\Delta\text{FEV}_1/\text{FVC}$   | 0.026<br>(-0.027-0.076) | 0.032<br>(-0.028-0.110) | 0.033<br>(-0.034-0.069) | 0.875   |

Data are shown as median (interquartile range).

Higher than 5 L changes in  $\Delta\text{FEV}_1$  have been excluded from the analysis.

Total n=164

$\text{FEV}_1$ : forced expiratory volume in 1 s; FVC: forced vital capacity.

**Table S4.** The change in lung function from baseline to the maximum lung function point ( $\text{Max}_{0-2.5}$ ) normalized with the time from baseline to the  $\text{Max}_{0-2.5}$  and with the daily dose of 1000  $\mu\text{g}$  budesonide equivalent in the groups of never-smokers, ex-smokers and current smokers.

|                                                                | Never-smokers           | Ex-smokers               | Current-smokers         | p-value |
|----------------------------------------------------------------|-------------------------|--------------------------|-------------------------|---------|
|                                                                | n=74                    | n=49                     | n=29                    |         |
| $\Delta \text{FEV}_1 \text{ mL/year/ } 1000 \mu\text{g}$       | 504.1<br>(155.3-1417.5) | 335.9<br>(18.6-1529.3)   | 625.0<br>(268.4-1481.2) | 0.622   |
| $\Delta \text{FEV}_1 \text{ \% pred/ year/ } 1000 \mu\text{g}$ | 15.9<br>(5.8-39.1)      | 11.8<br>(2.0-47.7)       | 18.7<br>(8.6-44.8)      | 0.632   |
| $\Delta \text{FVC mL/ year / } 1000 \mu\text{g}$               | 408.8<br>(-3.2-1222.8)  | 346.4<br>(-145.2-1658.6) | 781.3<br>(242.7-2099.9) | 0.199   |
| $\Delta \text{FVC \% pred /year/ } 1000 \mu\text{g}$           | 12.0<br>(1.9-31.0)      | 6.9<br>(-2.2-34.8)       | 26.5<br>(4.8-59.1)      | 0.129   |
| $\Delta \text{FEV}_1/\text{FVC /year / } 1000 \mu\text{g}$     | 0.041<br>(-0.032-0.124) | 0.044<br>(-0.037-0.151)  | 0.032<br>(-0.073-0.114) | 0.827   |

Data are shown as median (interquartile range).

Higher than 5 L changes in  $\Delta \text{FEV}_1$  have been excluded from the analysis.

Total n=152

$\text{FEV}_1$ : forced expiratory volume in 1 s; FVC: forced vital capacity.

**Table S5.** The change in lung function from baseline to the maximum lung function point (Max<sub>0-2.5</sub>) normalized to correspond daily use of 1000 µg budesonide in the groups of never-smokers and ever-smokers

|                                            | Never-smokers<br>N=82   | Ever-smokers<br>N=87   | p-value |
|--------------------------------------------|-------------------------|------------------------|---------|
| Δ FEV <sub>1</sub> mL/ 1000 µg bud eq      | 407.6<br>(144.4-1147.6) | 414.8<br>(81.1-1054.1) | 0.723   |
| Δ FEV <sub>1</sub> % pred / 1000 µg bud eq | 15.7 (7.5-33.5)         | 12.6 (4.6-27.3)        | 0.209   |
| Δ FVC mL/ 1000 µg bud eq                   | 347.9 (0.0-765.5)       | 363.0 (-38.0-1242.4)   | 0.510   |
| Δ FVC % pred / 1000 µg bud eq              | 10.2 (2.0-24.5)         | 8.7 (1.2-24.5)         | 0.856   |
| Δ FEV <sub>1</sub> /FVC (/ 1000 µg bud eq) | 0.045 (-0.027-0.115)    | 0.038 (-0.030-0.106)   | 0.809   |

Data are shown as median (interquartile range).

Higher than 5 L changes in Δ FEV<sub>1</sub> have been excluded from the analysis.

Total n=169

FEV<sub>1</sub>: forced expiratory volume in 1 s; FVC: forced vital capacity.

**Table S6.** Baseline (1999-2002) characteristics in patients with smoking history <10 pack-years and patients with smoking history ≥10 pack-years.

|                                            | Pack-years < 10     | Pack-years ≥ 10     | p-value |
|--------------------------------------------|---------------------|---------------------|---------|
| N                                          | 116                 | 53                  |         |
| Age, years                                 | 42.5 ±13.9          | 52.4 ±10.3          | < 0.001 |
| Males                                      | 37 (31.9)           | 34 (64.2)           | <0.001  |
| BMI kg·m <sup>-2</sup>                     | 26.6 (23.7-29.1)    | 28.7 (24.7-31.0)    | 0.031   |
| Pack-years <sup>#</sup>                    | 0                   | 17 (15-28)          |         |
| DL % predicted                             | 98.1 (89.8-112.8)   | 91.0 (77.0-105.0)   | 0.017   |
| DLVA % predicted                           | 104.5 (91.0-115.3)  | 90.0 (84.3-106.3)   | 0.003   |
| Blood eosinophils 10 <sup>9</sup> /l       | 0.29 (0.17-0.42)    | 0.28 (0.15-0.42)    | 0.985   |
| Blood eosinophils ≥0.3 x10 <sup>9</sup> /l | 55 (49.5)           | 23 (46.9)           | 0.864   |
| Pre-bronchodilator lung function           |                     |                     |         |
| FEV <sub>1</sub> L                         | 2.96 (2.35-3.35)    | 2.75 (2.11-3.32)    | 0.105   |
| FEV <sub>1</sub> % predicted               | 85.0 (73.8-94.8)    | 76.0 (63.9-83.5)    | <0.001  |
| FEV <sub>1</sub> /FVC                      | 0.760 (0.720-0.810) | 0.720 (0.630-0.790) | 0.003   |
| FVC L                                      | 3.80 (3.15-4.49)    | 3.64 (3.19-4.42)    | 0.853   |
| FVC % predicted                            | 91.9 (83.0-101.8)   | 83.3 (75.5-93.5)    | 0.004   |
| Post-bronchodilator lung function          |                     |                     |         |
| FEV <sub>1</sub> L                         | 3.15 (2.58-3.69)    | 2.83 (2.37-3.34)    | 0.042   |
| FEV <sub>1</sub> % predicted               | 90.0 (80.0-101.0)   | 79.5 (70.5-87.1)    | <0.001  |
| FEV <sub>1</sub> /FVC                      | 0.797 (0.760-0.843) | 0.749 (0.650-0.799) | <0.001  |
| FVC L                                      | 3.90 (3.25-4.52)    | 3.92 (3.36-4.62)    | 0.664   |
| FVC % predicted                            | 94.0 (85.0-104.0)   | 88.0 (79.8-98.1)    | 0.088   |
| FEV <sub>1</sub> /FVC ratio<0.7            | 10 (8.8)            | 16 (34.0)           | <0.001  |
| Atopy <sup>¶</sup>                         | 44 (41.1)           | 14 (29.8)           | 0.209   |
| ICS bud eq/day <sup>a</sup>                | 573 (312-809)       | 714 (555-953)       | 0.004   |

<sup>#</sup> of ever-smokers (ex- and current smokers)

<sup>¶</sup> as defined by positive skin-prick tests.

<sup>a</sup> daily dispensed ICS doses as 1000 µg budesonide equivalent.

Data are presented as n (%), mean  $\pm$  SD or median (interquartile range).

Total n=174

BMI: body mass index; DL: diffusing capacity of the lung; VA: alveolar volume FEV<sub>1</sub>: forced expiratory volume in 1 s; FVC: forced vital capacity; ICS: inhaled corticosteroids.

### Supplementary References:

1. Kankaanranta H, Ilmarinen P, Kankaanranta T, Tuomisto LE. Seinäjoki Adult Asthma Study (SAAS): a protocol for a 12-year real-life follow-up study of new-onset asthma diagnosed at adult age and treated in primary and specialised care. *NPJ Prim Care Respir Med.* 2015;25:15042. doi: 10.1038/npjpcrm.2015.42.
